# Supplementary material
Source: PubMed Central journal article supplement (PMC2900380)

## Supplement Figure 1

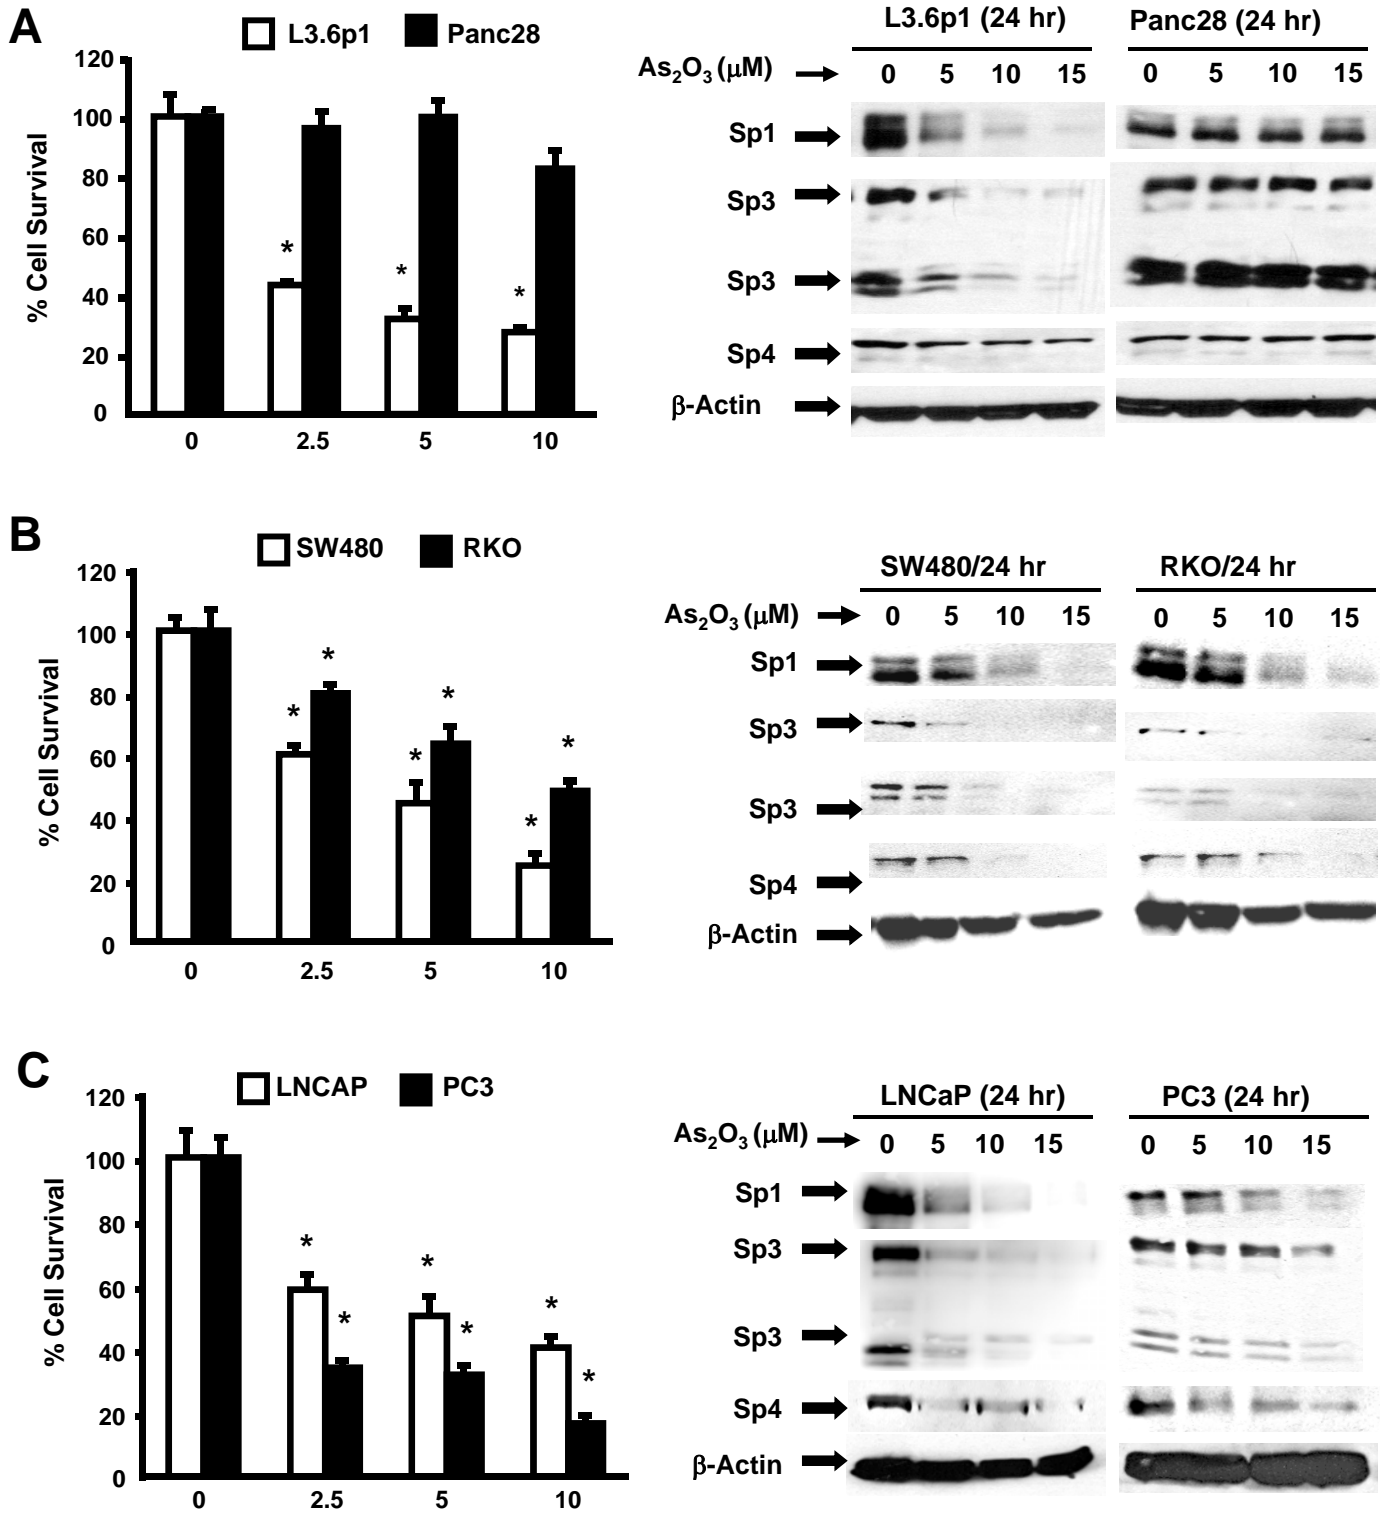

Supplement: NIHMS210334-supplement-01.pdf [file NIHMS210334-supplement-01.pdf]

Supplement Figure 2

KU7/ iSp/ ROS

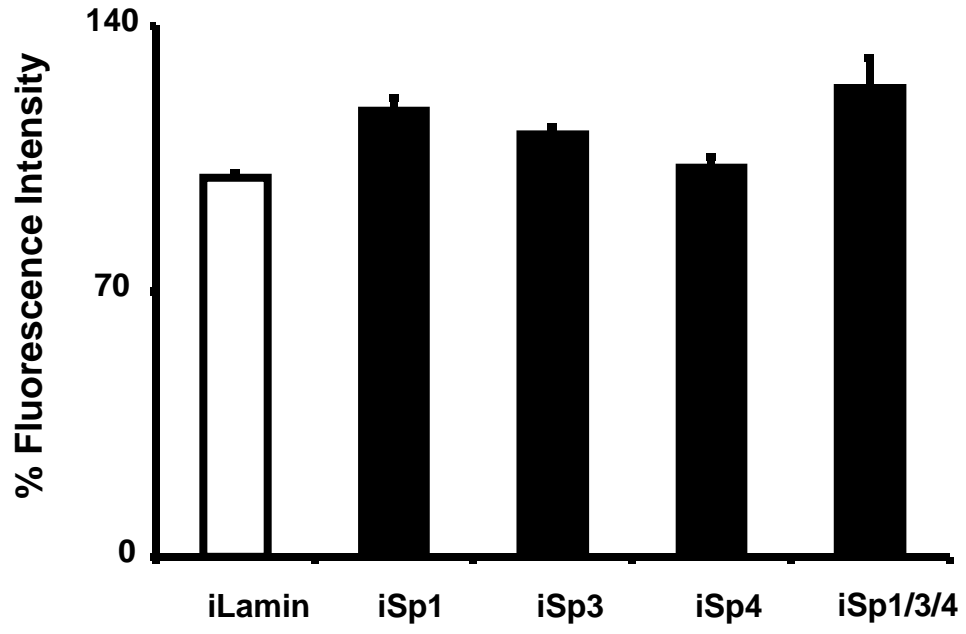

Supplement: NIHMS210334-supplement-02.pdf [file NIHMS210334-supplement-02.pdf]

### Supplement Figure 3

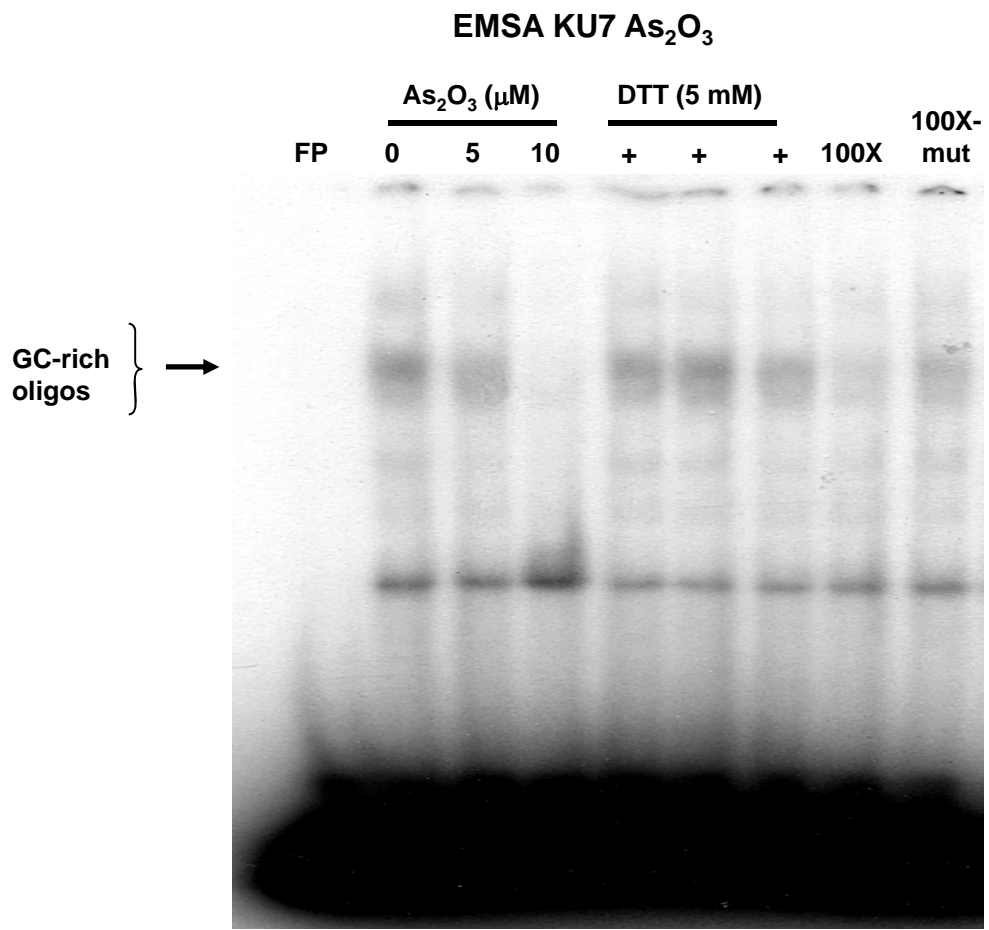

Supplement: NIHMS210334-supplement-03.pdf [file NIHMS210334-supplement-03.pdf]

## Supplement Figure 4

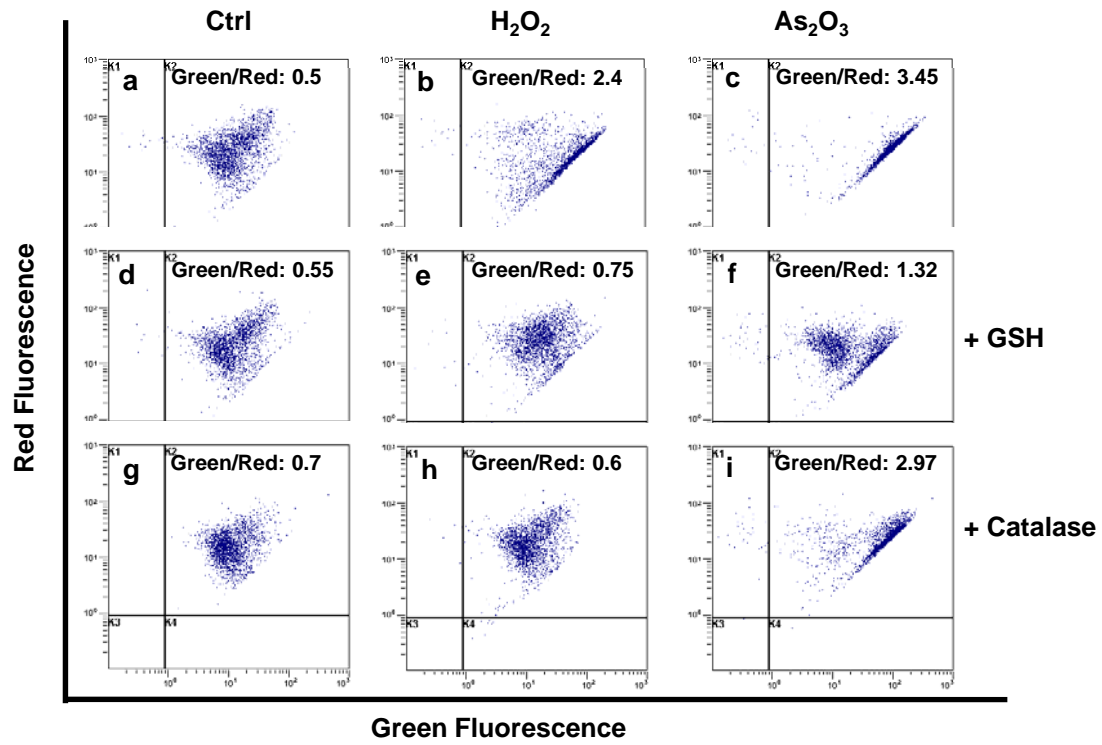

Supplement: NIHMS210334-supplement-04.pdf [file NIHMS210334-supplement-04.pdf]
